# Supplementary material for: A new multifunctional anionic 3D Zn(ii)-MOF based on heptanuclear clusters: selective adsorption of organic dyes and a dual-emitting sensor for nitroantibiotics
Source: Royal Society of Chemistry journal article supplement (doi:10.1039/d2ce01218a), 2022-01-01
Supplement: d2ce01218a1.pdf [file d2ce01218a1.pdf]

## Supporting Information

### **A new multifunctional anionic 3D Zn(II)-MOF based on heptanuclear clusters: selective adsorption of organic dyes and dual-emitting sensor for nitroantibiotics**

Yan-Fang Du<sup>a</sup>, Xi-Xi Wang<sup>a</sup>, Ai-Ling Cheng<sup>\*a</sup>, Yuan-Yuan Wang<sup>a</sup>, En-Qing Gao<sup>b</sup>

<sup>a</sup> *College of Chemistry and Molecular Engineering, East China Normal University, Shanghai 200240, People's Republic of China.*

<sup>b</sup> *Shanghai Key Laboratory of Green Chemistry and Chemical Processes, College of Chemistry and Molecular Engineering, East China Normal University, Shanghai 200062, People's Republic of China.*

# Contents

|                                                                                                                                                                                                                                                                                                                                                            |    |
|------------------------------------------------------------------------------------------------------------------------------------------------------------------------------------------------------------------------------------------------------------------------------------------------------------------------------------------------------------|----|
| <b>S1. General methods</b> .....                                                                                                                                                                                                                                                                                                                           | 4  |
| <b>S2. X-ray Crystallography.</b> .....                                                                                                                                                                                                                                                                                                                    | 4  |
| <b>S3. Explanation for the Alert A and B in the CheckCIF reports</b> .....                                                                                                                                                                                                                                                                                 | 4  |
| <b>Table S1.</b> Crystal data and structural refinements for <b>1</b> . .....                                                                                                                                                                                                                                                                              | 5  |
| <b>Figure S1.</b> <sup>1</sup> H-NMR (DMSO-d <sub>6</sub> , 500 MHz) spectrum of H <sub>2</sub> L. δ: 4.13 (s, 3H, -OCH <sub>3</sub> ), 7.87 (1H), 7.93 (1H), 8.2-8.5 (3H). .....                                                                                                                                                                          | 6  |
| <b>Figure S2.</b> IR spectra of H <sub>2</sub> L ligand and complex <b>1</b> . .....                                                                                                                                                                                                                                                                       | 6  |
| <b>Figure S3.</b> [Zn <sub>7</sub> (μ <sub>3</sub> -OH) <sub>3</sub> (COO) <sub>6</sub> ] SBU of UoC-1 (a and b); [Mn <sub>8</sub> (μ <sub>4</sub> -O) <sub>3</sub> (COO) <sub>12</sub> ] SBU of Mn-1 (c). .....                                                                                                                                           | 7  |
| <b>Figure S4.</b> Coordination environment of the ligand in UoC-1 (a), Mn-MOF (b) and <b>1</b> (c).....                                                                                                                                                                                                                                                    | 7  |
| <b>Figure S5.</b> <sup>1</sup> H-NMR (D <sub>2</sub> O) spectrum of the NaCl solution after soaking <b>1</b> . (DMA molecules also release from the framework owing to the partial collapse of <b>1</b> in water.) δ: 2.33 (-OC-CH <sub>3</sub> ), 2.98(-N-CH <sub>3</sub> ), 3.14 (-CO-N-CH <sub>3</sub> ), 3.30 (-CO-N-CH <sub>3</sub> ). .....          | 8  |
| <b>Figure S6.</b> PXRD patterns showing the purity and stability of <b>1</b> .....                                                                                                                                                                                                                                                                         | 8  |
| <b>Figure S7.</b> TGA curves of the as-synthesized <b>1</b> (under N <sub>2</sub> atmosphere) and the activated samples of <b>1</b> (under air). The evacuated sample of <b>1</b> was obtained by solvent exchange with EtOH for three days, during which time the solvent was changed every 12 hours, then dried under vacuum at 180°C for 12 hours. .... | 9  |
| <b>Figure S8.</b> Molecular structures of the organic dye compounds.....                                                                                                                                                                                                                                                                                   | 9  |
| <b>Figure S9.</b> Photographs of crystal samples of <b>1</b> and dye@ <b>1</b> .....                                                                                                                                                                                                                                                                       | 10 |
| <b>Figure S10.</b> Zeta potential of <b>1</b> in water.....                                                                                                                                                                                                                                                                                                | 10 |
| <b>Figure S11.</b> IR spectra of <b>1</b> , dyes and dye@ <b>1</b> .....                                                                                                                                                                                                                                                                                   | 12 |
| <b>Figure S12.</b> XRD patterns of crystal samples of <b>1</b> before and after dye adsorption.....                                                                                                                                                                                                                                                        | 12 |
| <b>Figure S13.</b> The absorbed intensity (dots) of MB, CV and RhB at different concentrations (mg/L). The solid lines are the best linear fit. ....                                                                                                                                                                                                       | 13 |
| <b>Table S1.</b> Equations for adsorption amounts and dye removal rate.....                                                                                                                                                                                                                                                                                | 13 |
| <b>Table S2.</b> Adsorption kinetics model. ....                                                                                                                                                                                                                                                                                                           | 13 |
| <b>Figure S14.</b> Plots of pseudo-first-order kinetics for the adsorption of MB, CV and RhB on <b>1</b> (Experiment Conditions: <i>T</i> = 25°C, <i>V</i> = 10 mL, <i>C</i> <sub>0</sub> = 10 mg·L <sup>-1</sup> , <i>m</i> = 10 mg).....                                                                                                                 | 14 |
| <b>Figure S15.</b> Adsorption isotherms of MB, CV and RhB on <b>1</b> at room temperature.....                                                                                                                                                                                                                                                             | 14 |
| <b>Table S3.</b> Adsorption isotherm model.....                                                                                                                                                                                                                                                                                                            | 15 |
| <b>Figure S16.</b> Reusability of <b>1</b> for the adsorption of MB. ....                                                                                                                                                                                                                                                                                  | 15 |
| <b>Figure S17.</b> The fluorescent emission spectra of EtOH solution of RhB with different concentrations. ....                                                                                                                                                                                                                                            | 16 |

|                                                                                                                                                                                                                       |    |
|-----------------------------------------------------------------------------------------------------------------------------------------------------------------------------------------------------------------------|----|
| <b>Figure S18.</b> The fluorescent emission spectra of RhB@1 in EtOH with different amounts of RhB.<br>.....                                                                                                          | 16 |
| <b>Figure S19.</b> Molecule structures of the antibiotics selected in this work. ....                                                                                                                                 | 17 |
| <b>Figure S20.</b> Fluorescence spectra of RhB@1 dispersed into different antibiotics in EtOH solutions (700 $\mu$ M). ....                                                                                           | 17 |
| <b>Figure S21.</b> Color changes of 1 suspension upon RhB adsorption (a. 1 dispersed in EtOH; b. RhB@1 dispersed in EtOH). ....                                                                                       | 18 |
| <b>Figure S22.</b> (a) Luminescent stability of suspension of RhB@1 in EtOH within 80 minutes; (b) Response times of RhB@1 towards NFT and NFZ. ....                                                                  | 18 |
| <b>Figure S23.</b> Emission spectra of 1 upon incremental addition of NFT (a) and NFZ (b); The Stern–Volume plots of 1 for NFT (c) and NFZ (d). Inset: Linear relationship of the SV plots at low concentration. .... | 19 |
| <b>Figure S24.</b> Fluorescence intensities of 1 in five recyclable experiments for sensing NFT (a) and NFZ (c) in EtOH. ....                                                                                         | 19 |
| <b>Figure S25.</b> X-ray diffraction of RhB@1 before and after sensing NFT/NFZ. ....                                                                                                                                  | 20 |
| <b>Figure S26.</b> Spectral overlap between the absorption spectra of various antibiotics and the excitation spectrum of RhB@1. ....                                                                                  | 20 |
| <b>Table S4.</b> The values of $K_{SV}$ and LOD of RhB@1, CP 1 and other reported MOF sensors towards NFT/NFZ. ....                                                                                                   | 21 |
| <b>References:</b> .....                                                                                                                                                                                              | 21 |

## S1. General methods

Powder X-ray diffraction (PXRD) patterns were collected on a Rigaku ULTIMA IV diffractometer equipped with Cu K $\alpha$  in a  $2\theta$  range of 5–40°. FT-IR spectra were recorded on a Nicolet NEXUS 670 spectrophotometer using KBr pellets in the range of 500–4000 cm<sup>-1</sup>. Elemental analyses (C, H and N) were performed on an Elementar Vario ELIII analyzer. Inductively coupled plasma (ICP) experiment was conducted with a ThermoFisher ICAP7200HS emission spectrometer. TG analyses were carried out on a Mettler Toledo TGA/SDTA851 instrument under flowing N<sub>2</sub> or air atmosphere with a heating rate of 5°C min<sup>-1</sup>. UV-visible absorption spectra were measured on a SHIMADZU UV-1800 spectrophotometer. Fluorescence spectra were recorded at room temperature with an Edinburgh FLS980 fluorescence spectrophotometer. The zeta potential was performed by JS94H microiontophoresis apparatus.

## S2. X-ray Crystallography.

Diffraction intensity data for **1** was collected on a Bruker Apex II CCD area detector equipped with graphite-monochromated Mo-K $\alpha$  radiation ( $\lambda = 0.71073 \text{ \AA}$ ) at 293K. Empirical absorption correction was applied using the SADABS program. The structure was solved by direct methods and refined by the full-matrix least-squares based on F<sup>2</sup> using SHELXTL. The non-hydrogen atoms were refined anisotropically, and the hydrogen atoms of the ligands were placed in calculated positions and refined using a riding model. Notably, the solvent molecules are highly disordered and could not be modeled correctly, so the residual electron densities resulting from them were removed by Solvent Mask in Olex2. A solvent mask was calculated and 2424 electrons were found in a volume of 17477Å<sup>3</sup> in 1 void per unit cell. This is consistent with the presence of 1 [C<sub>2</sub>H<sub>8</sub>N]<sup>+</sup>, 6[C<sub>2</sub>H<sub>9</sub>NO] and 24[H<sub>2</sub>O] per Formula Unit which account for 2412 electrons per unit cell.

## S3. Explanation for the Alert A and B in the CheckCIF reports

### 🚨 Alert level B

PLAT241\_ALERT\_2\_B High 'MainMol' Ueq as Compared to Neighbors of O1  
Check

Explanation: This alert comes from the large amount of disorder in the structure and the poor quality of the crystal data.

**Table S1.** Crystal data and structural refinements for **1**.

| Complex                                            | <b>CP-1</b>                                                                                     |
|----------------------------------------------------|-------------------------------------------------------------------------------------------------|
| Formula                                            | Zn <sub>7</sub> C <sub>116</sub> H <sub>163</sub> O <sub>76</sub> N <sub>7</sub> S <sub>6</sub> |
| Fw                                                 | 3521.65                                                                                         |
| Crystal system                                     | trigonal                                                                                        |
| Space group                                        | $R\bar{3}c$                                                                                     |
| <i>a</i> (Å)                                       | 20.7129(8)                                                                                      |
| <i>b</i> (Å)                                       | 20.7129(8)                                                                                      |
| <i>c</i> (Å)                                       | 77.627(3)                                                                                       |
| $\alpha$                                           | 90                                                                                              |
| $\beta$                                            | 90                                                                                              |
| $\gamma$                                           | 120                                                                                             |
| <i>V</i> (Å <sup>3</sup> )                         | 28842.1(18)                                                                                     |
| <i>Z</i>                                           | 6                                                                                               |
| $\rho_{calc}$ (g m <sup>-3</sup> )                 | 1.178                                                                                           |
| $\mu$ (mm <sup>-1</sup> )                          | 2.224                                                                                           |
| <i>F</i> (000)                                     | 10616.064                                                                                       |
| reflections collected                              | 104521                                                                                          |
| unique reflections                                 | 6539                                                                                            |
| <i>R</i> <sub>int</sub>                            | 0.0768                                                                                          |
| <i>GOF</i>                                         | 1.0035                                                                                          |
| <i>R</i> <sub>1</sub> [ <i>I</i> > 2σ( <i>I</i> )] | 0.0862                                                                                          |
| <i>wR</i> <sub>2</sub> (all data)                  | 0.3089                                                                                          |

\*The refinement results were obtained from Olex2 using Solvent Mask.

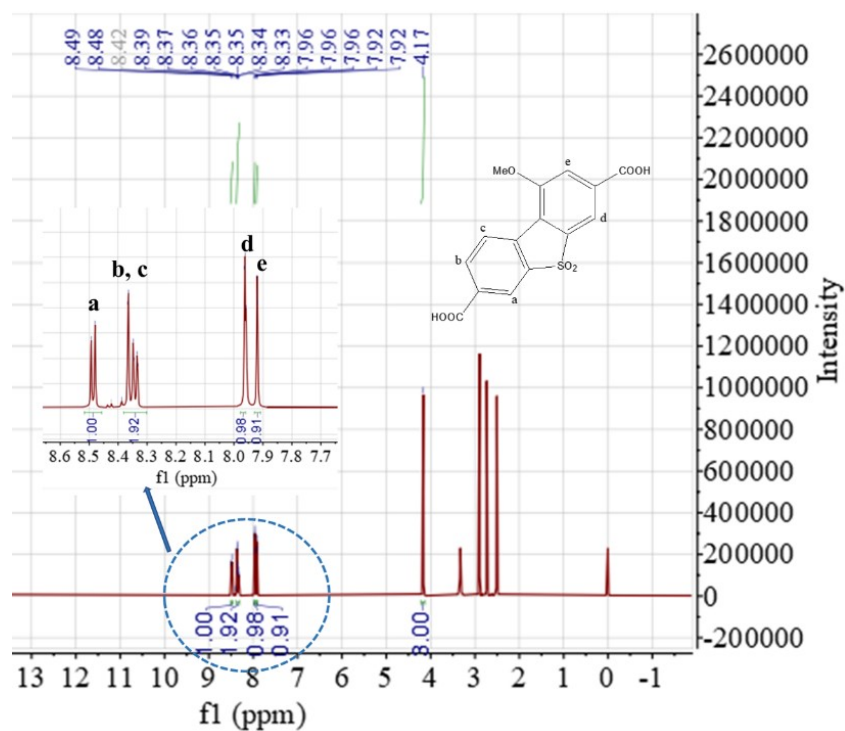

**Figure S1.** <sup>1</sup>H-NMR (DMSO-d<sub>6</sub>, 500 MHz) spectrum of H<sub>2</sub>L. δ: 4.13 (s, 3H, -OCH<sub>3</sub>), 7.87 (1H), 7.93 (1H), 8.2-8.5 (3H).

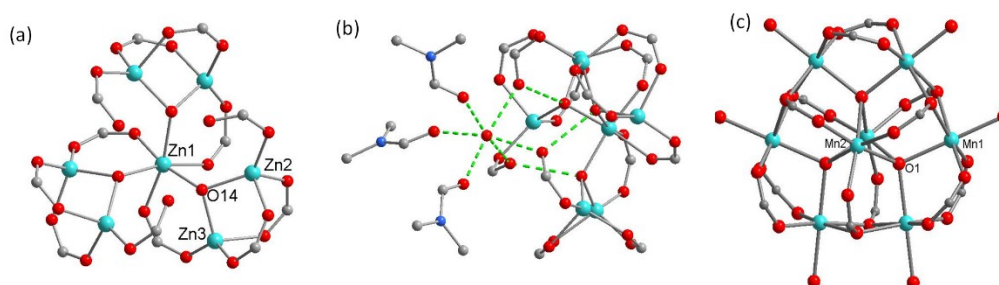

**Figure S2.** [Zn<sub>7</sub>(μ<sub>3</sub>-OH)<sub>3</sub>(COO)<sub>6</sub>] SBU of UoC-1 (a and b); [Mn<sub>8</sub>(μ<sub>4</sub>-O)<sub>3</sub>(COO)<sub>12</sub>] SBU of Mn-1 (c).

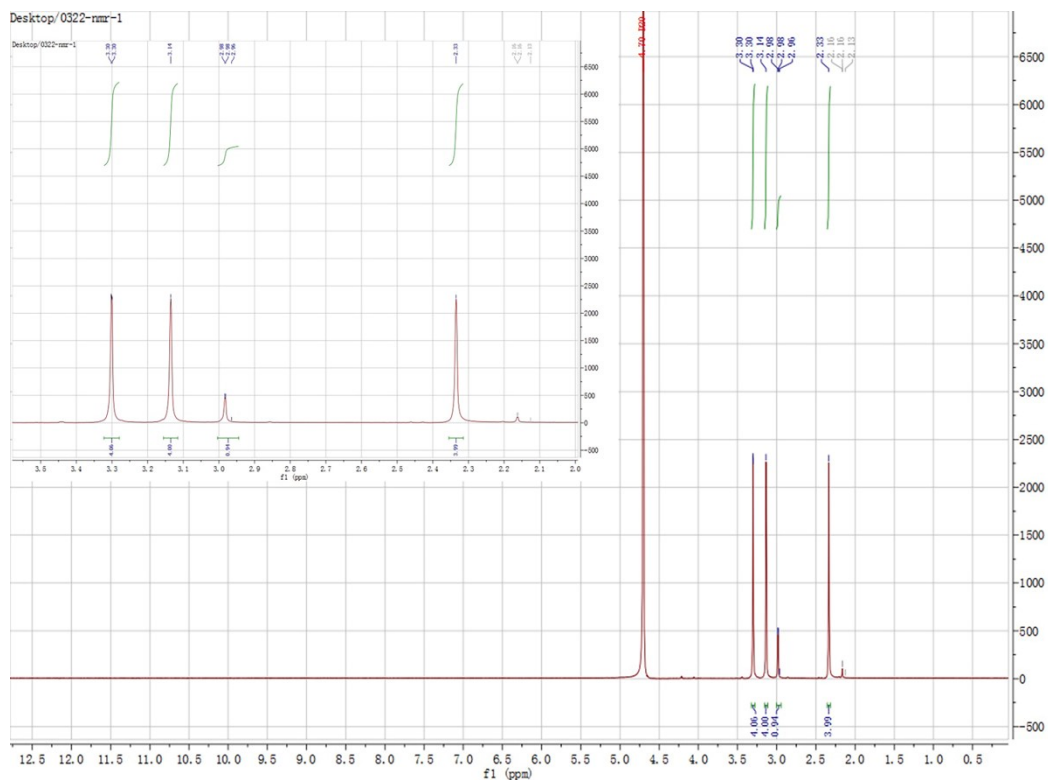

**Figure S3.**  $^1\text{H-NMR}$  ( $\text{D}_2\text{O}$ ) spectrum of the  $\text{NaCl}$  solution after soaking **1**. (DMA molecules also release from the framework owing to the partial collapse of **1** in water.)  $\delta$ : 2.33 ( $-\text{OC}-\text{CH}_3$ ), 2.98 ( $-\text{N}-\text{CH}_3$ ), 3.14 ( $-\text{CO}-\text{N}-\text{CH}_3$ ), 3.30 ( $-\text{CO}-\text{N}-\text{CH}_3$ ).

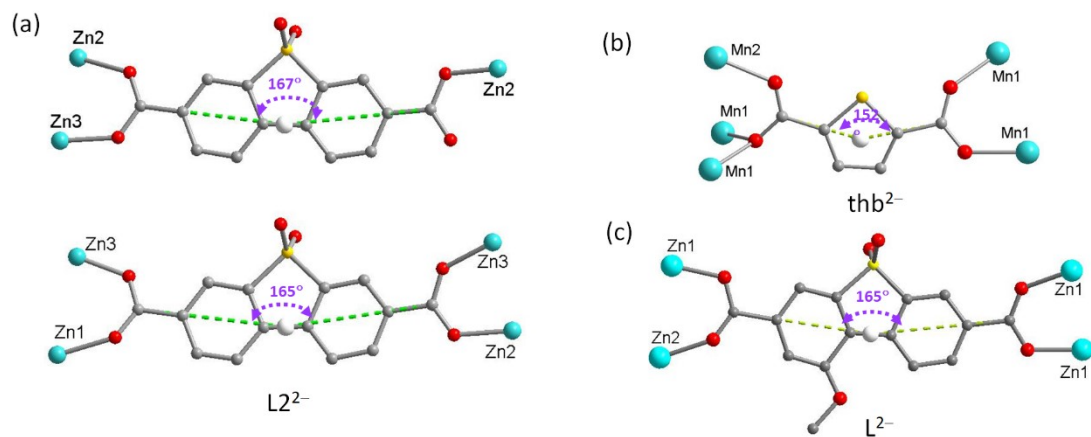

**Figure S4.** Coordination environment of the ligand in UoC-1 (a), Mn-MOF (b) and **1** (c).

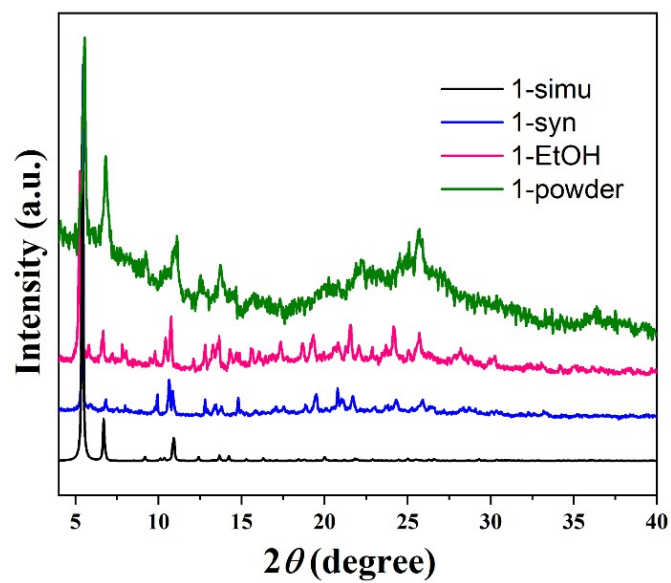

Figure S5. PXRD patterns showing the purity and stability of 1.

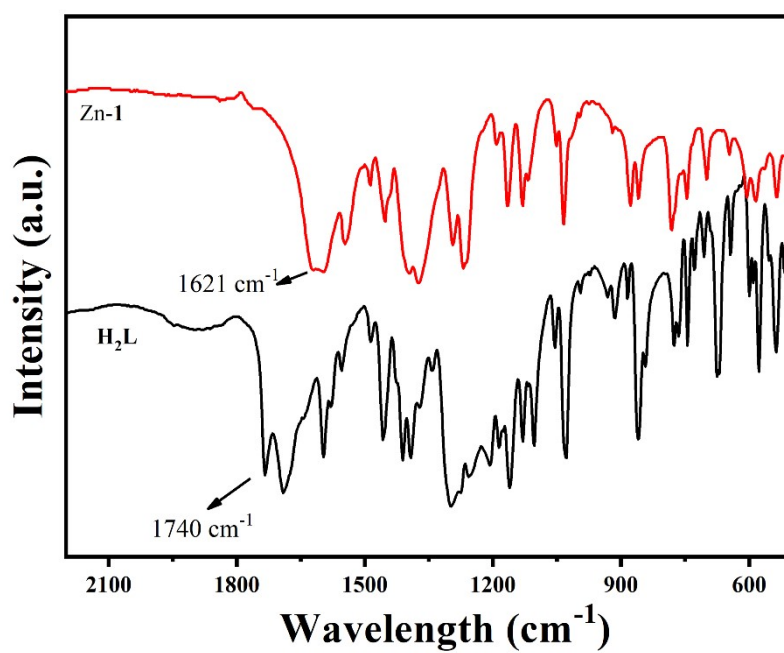

Figure S6. IR spectra of  $H_2L$  ligand and complex 1.



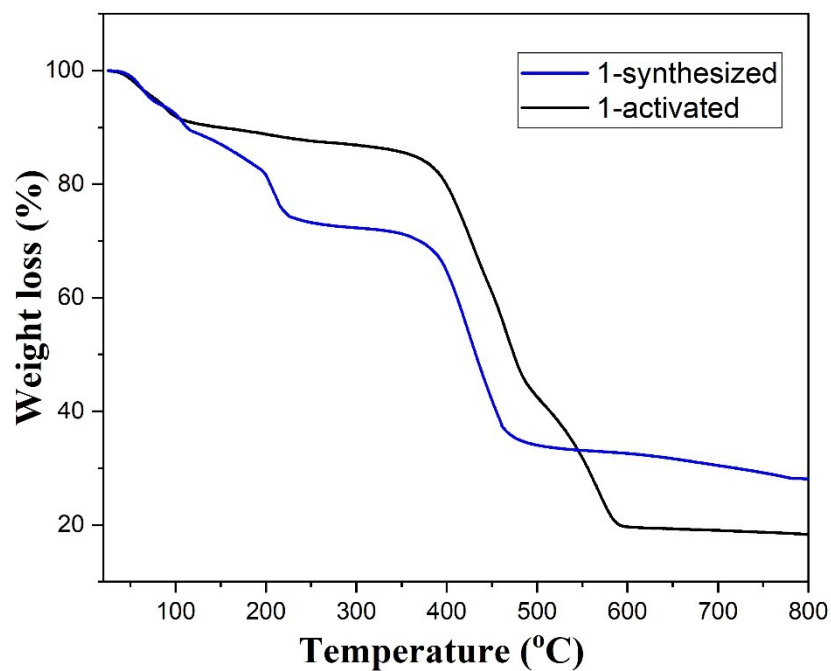

**Figure S7.** TGA curves of the as-synthesized **1** (under N<sub>2</sub> atmosphere) and the activated samples of **1** (under air). The evacuated sample of **1** was obtained by solvent exchange with EtOH for three days, during which time the solvent was changed every 12 hours, then dried under vacuum at 180°C for 12 hours.

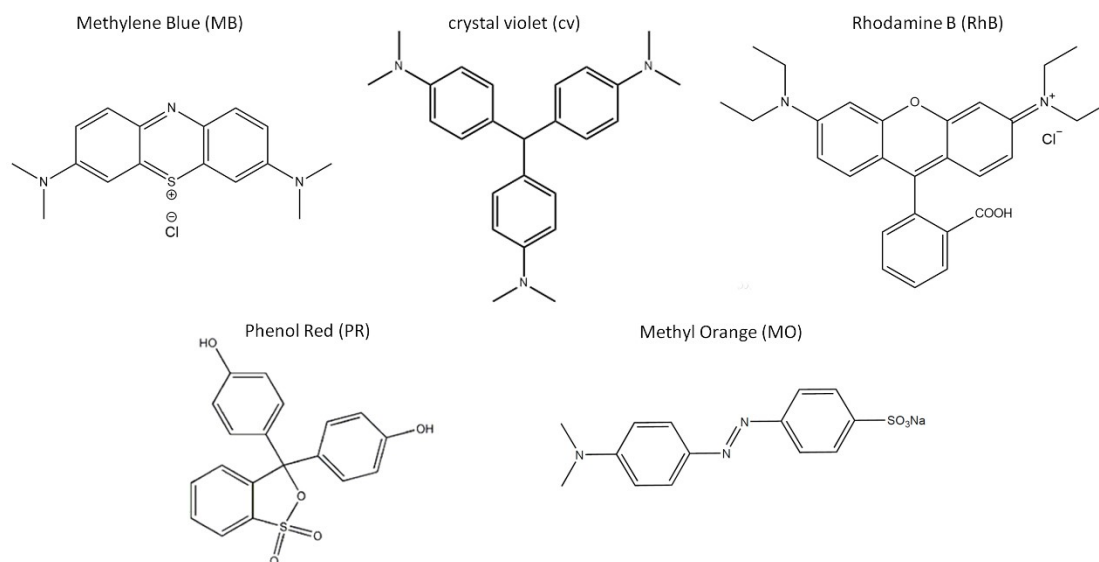

**Figure S8.** Molecular structures of the organic dye compounds.

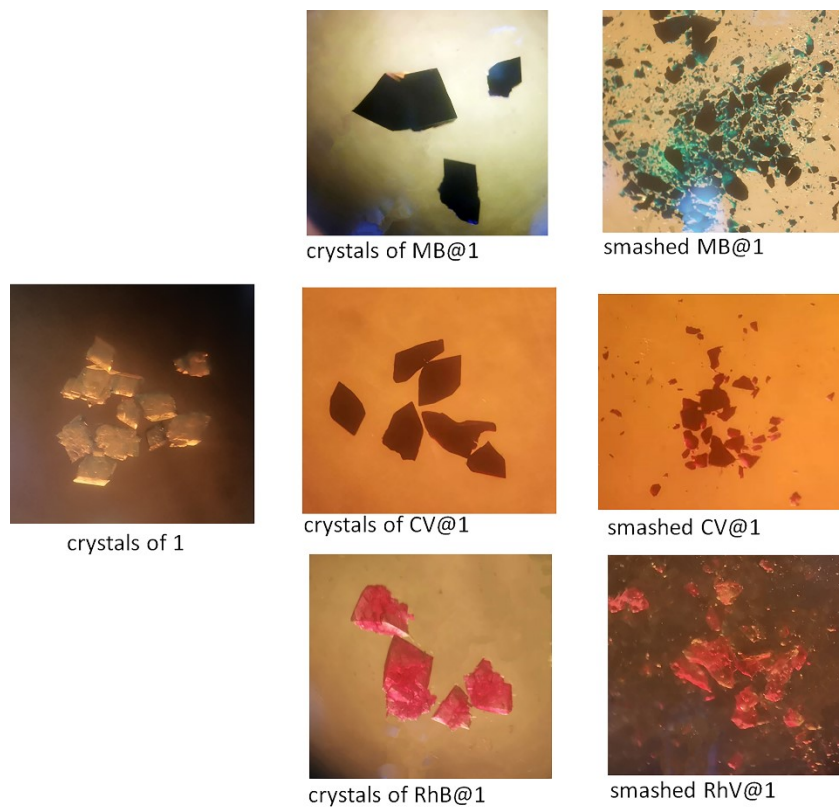

**Figure S9.** Photographs of crystal samples of **1** and dye@**1**.

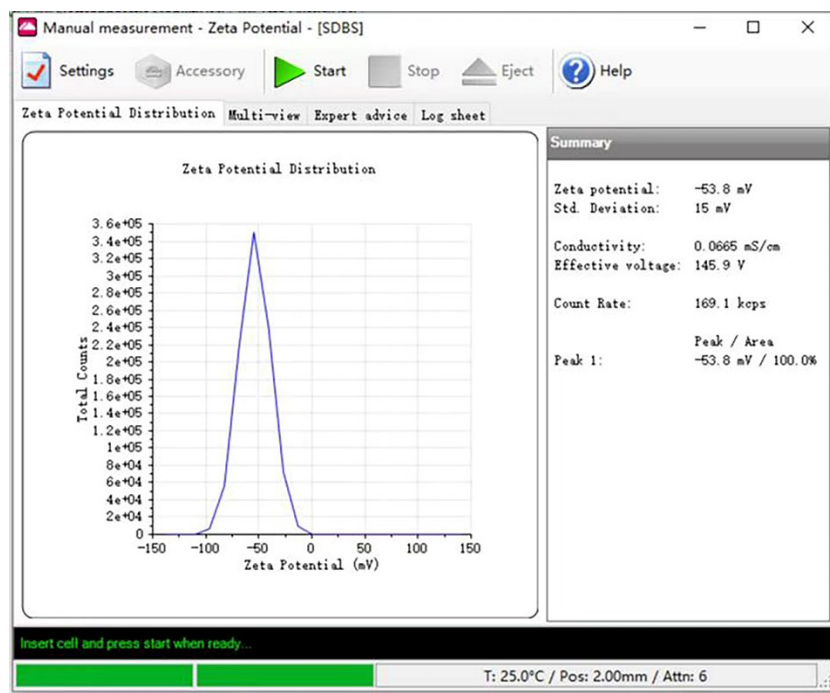

**Figure S10.** Zeta potential of **1** in water.

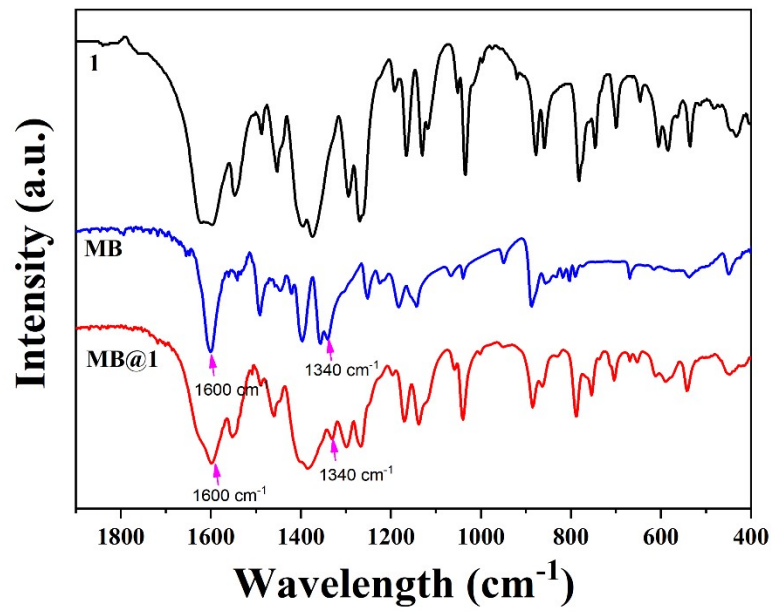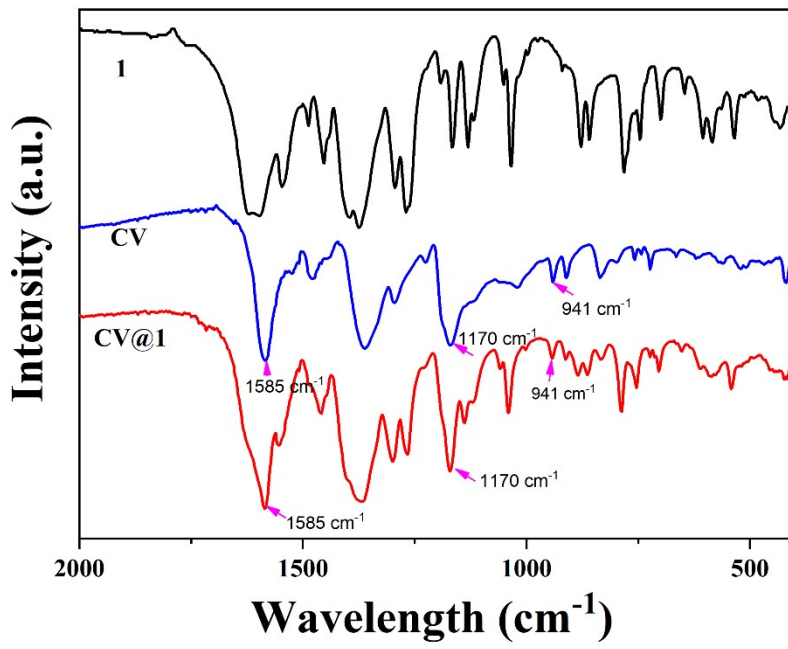

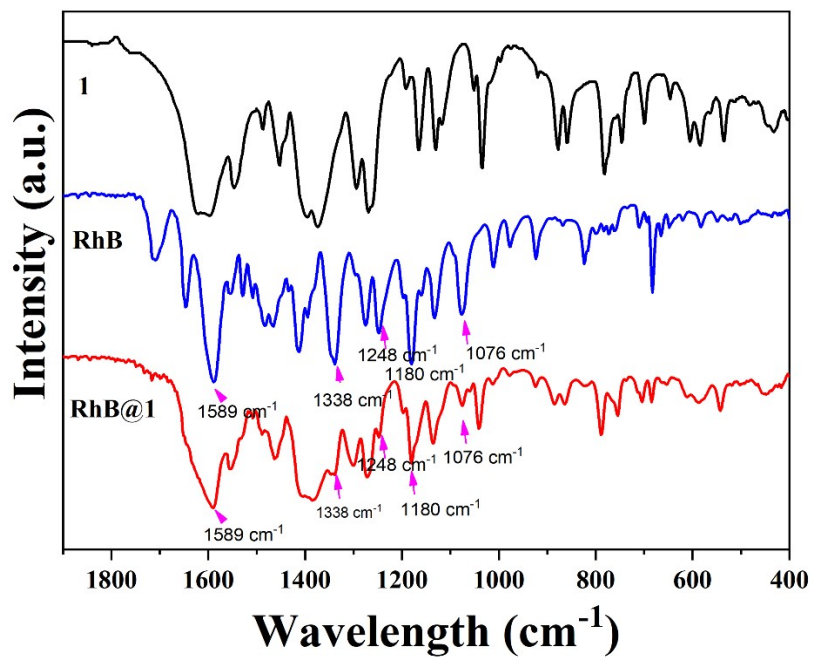

Figure S11. IR spectra of 1, dyes and dye@1.

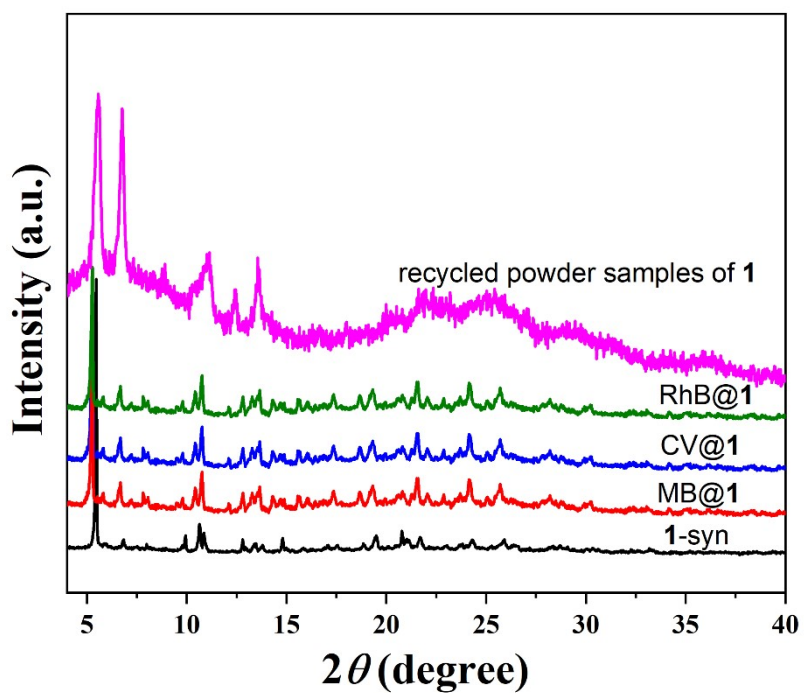

Figure S12. XRD patterns of crystal samples of 1 before and after dye adsorption.

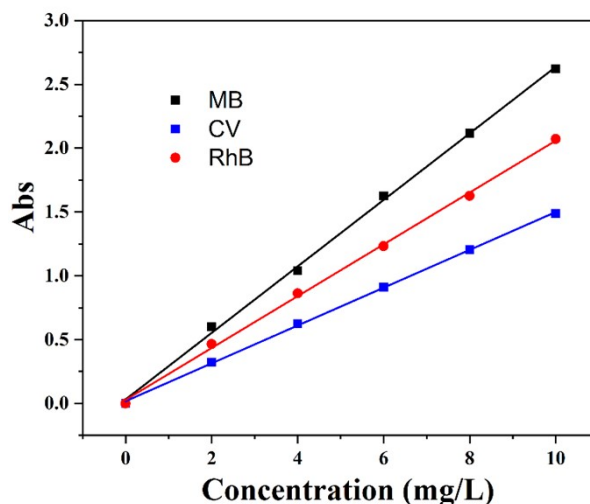

| dyes | Fitting linear equations | R <sup>2</sup> (%) |
|------|--------------------------|--------------------|
| MB   | y = 0.2605 x + 0.03124   | 99.85              |
| CV   | y = 0.1482 x + 0.01771   | 99.94              |
| RhB  | y = 0.203 x + 0.028      | 99.85              |

**Figure S13.** The absorbed intensity (dots) of MB, CV and RhB at different concentrations (mg/L). The solid lines are the best linear fit.

**Table S1.** Equations for adsorption amounts and dye removal rate

| Introduction                   | Equations                                   | Comment                                                                                                                                                                                                                             |
|--------------------------------|---------------------------------------------|-------------------------------------------------------------------------------------------------------------------------------------------------------------------------------------------------------------------------------------|
| Adsorption amounts             | $Q_t = \frac{(C_0 - C_t)V}{m}$              | Where $m$ (g) presents the weight of the adsorbent; $C_0$ (mg·L <sup>-1</sup> ) is the initial dye concentration and $C_t$ (mg·L <sup>-1</sup> ) is the dye concentration at time $t$ ; $V$ (L) denotes the volume of dye solution. |
| Dye removal rate ( $\eta$ , %) | $\eta = \frac{C_0 - C_t}{C_0} \times 100\%$ |                                                                                                                                                                                                                                     |

**Table S2.** Adsorption kinetics model.

| Introduction                       | Kinetic model                                         | Comment                                                                                                                                                                      |
|------------------------------------|-------------------------------------------------------|------------------------------------------------------------------------------------------------------------------------------------------------------------------------------|
| Pseudo first-order kinetics model  | $\ln(Q_e - Q_t) = \ln Q_e - k_1 t$                    | Where $Q_t$ and $Q_e$ (mg·g <sup>-1</sup> ) are the adsorption capacity at time $t$ and equilibrium; and $k_1$ (min <sup>-1</sup> ) is the pseudo-first-order rate constant. |
| Pseudo second-order kinetics model | $\frac{t}{Q_t} = \frac{1}{k_2 Q_e^2} + \frac{t}{Q_e}$ | Where $k_2$ (g·mg <sup>-1</sup> ·min <sup>-1</sup> ) is the pseudo-second-order rate constant.                                                                               |

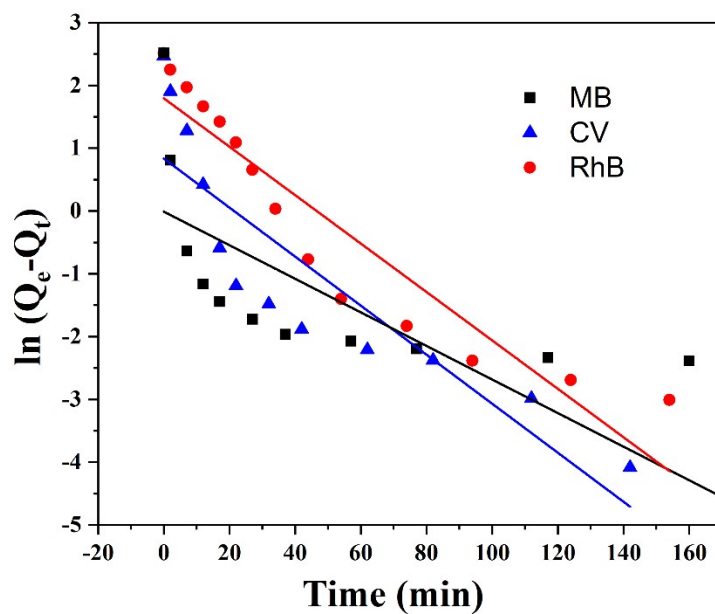

**Figure S14.** Plots of pseudo-first-order kinetics for the adsorption of MB, CV and RhB on 1 (Experiment Conditions:  $T = 25^\circ\text{C}$ ,  $V = 10\text{ mL}$ ,  $C_0 = 10\text{ mg}\cdot\text{L}^{-1}$ ,  $m = 10\text{ mg}$ )

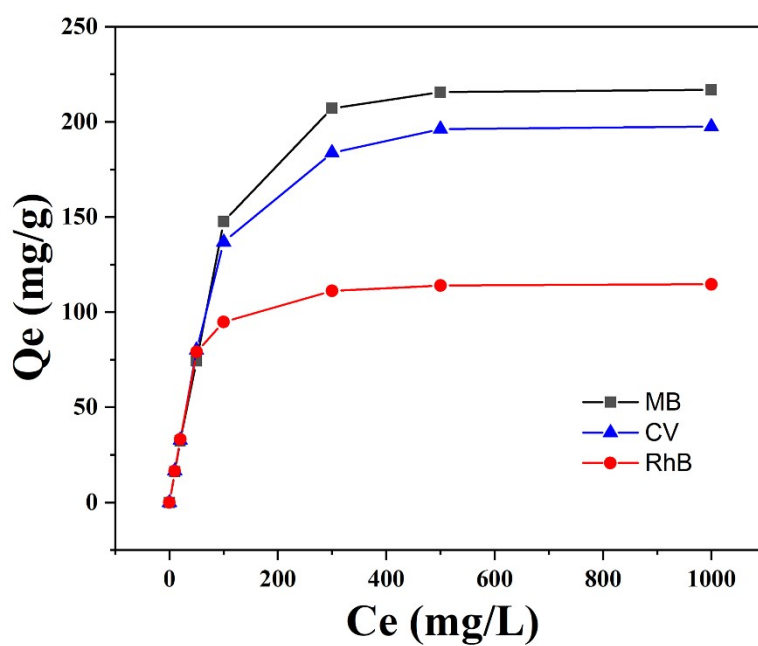

**Figure S15.** Adsorption isotherms of MB, CV and RhB on 1 at room temperature.

**Table S3.** Adsorption isotherm model

| Introduction        | Isotherm model                                                  | Comment                                                                                                                                                                                                                                                                         |
|---------------------|-----------------------------------------------------------------|---------------------------------------------------------------------------------------------------------------------------------------------------------------------------------------------------------------------------------------------------------------------------------|
| Langmuir isotherm   | $\frac{C_e}{Q_e} = \frac{C_e}{Q_{max}} + \frac{1}{K_L q_{max}}$ | Where $C_e$ ( $\text{mg L}^{-1}$ ) is the equilibrium concentration of adsorbate; $Q_e$ and $Q_m$ ( $\text{mg L}^{-1}$ ) represent the equilibrium adsorption capacity and maximum adsorption capacity, respectively; $K_L$ ( $\text{mg L}^{-1}$ ) named the Langmuir constant; |
| Freundlich isotherm | $\ln Q_e = \ln K_F + \frac{1}{n}(\ln C_e)$                      | Where $K_F$ is the Freundlich constant related to the adsorption capacity; $n$ is the adsorption strength constant under the Freundlich model.                                                                                                                                  |

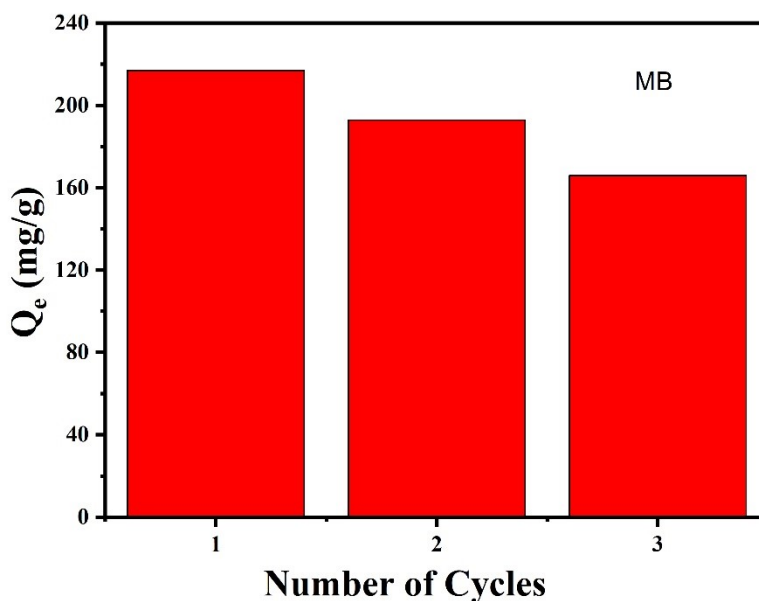**Figure S16.** Reusability of **1** for the adsorption of MB.

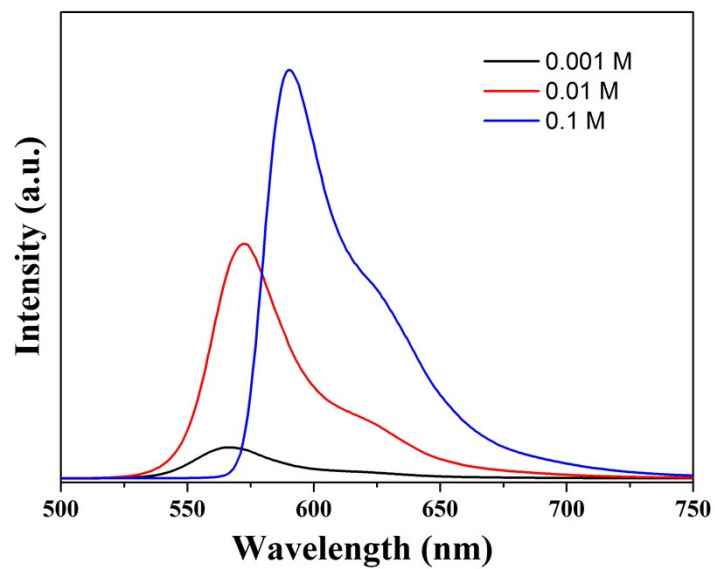

**Figure S17.** The fluorescent emission spectra of EtOH solution of RhB with different concentrations.

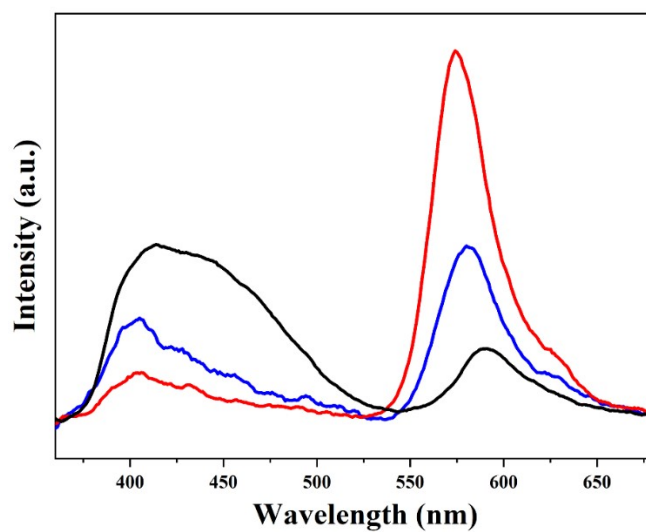

**Figure S18.** The fluorescent emission spectra of RhB@1 in EtOH with different amounts of RhB.



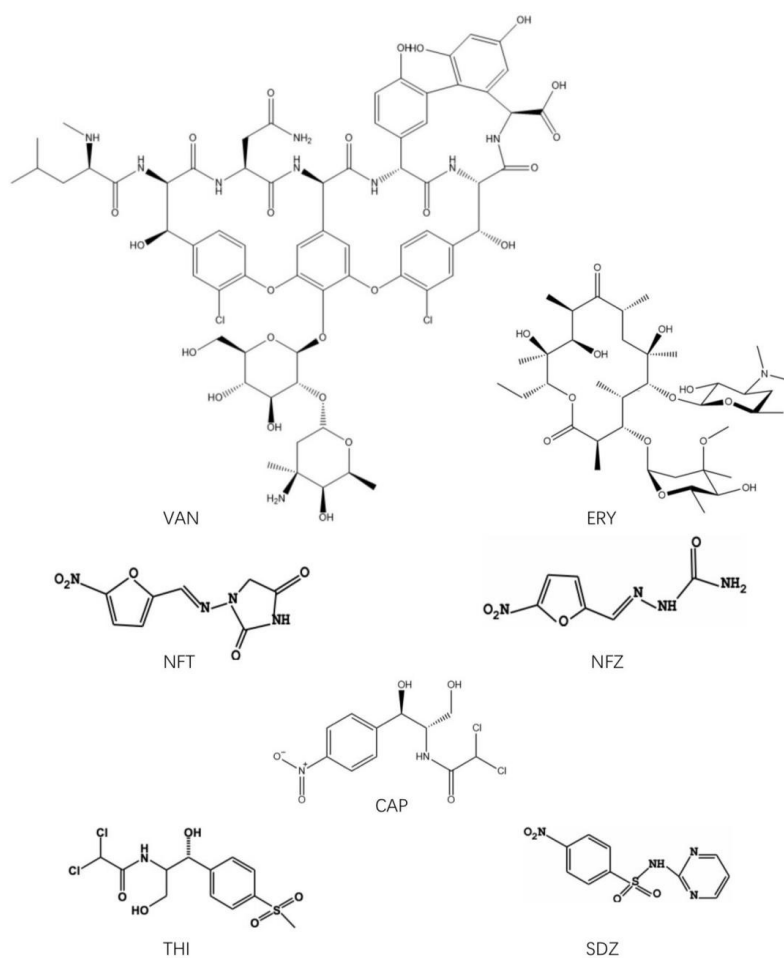

**Figure S19.** Molecule structures of the antibiotics selected in this work.

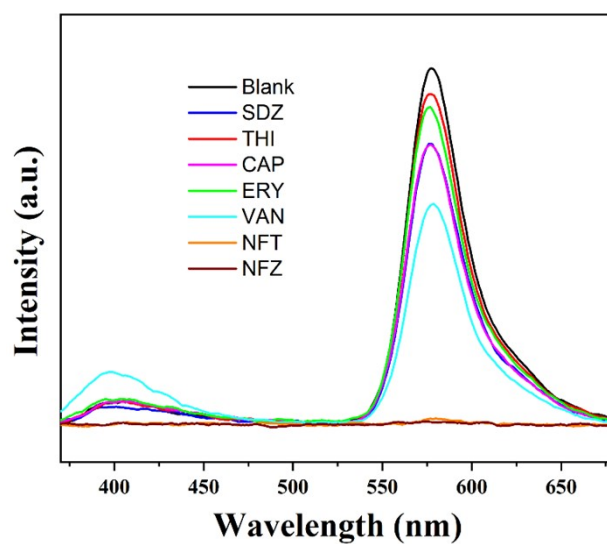

**Figure S20.** Fluorescence spectra of RhB@1 dispersed into different antibiotics in EtOH solutions (700  $\mu\text{M}$ ).

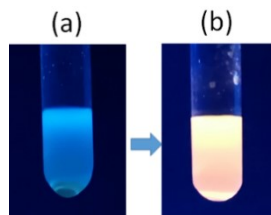

**Figure S21.** Color changes of **1** suspension upon RhB adsorption (a. **1** dispersed in EtOH; b. **RhB@1** dispersed in EtOH).

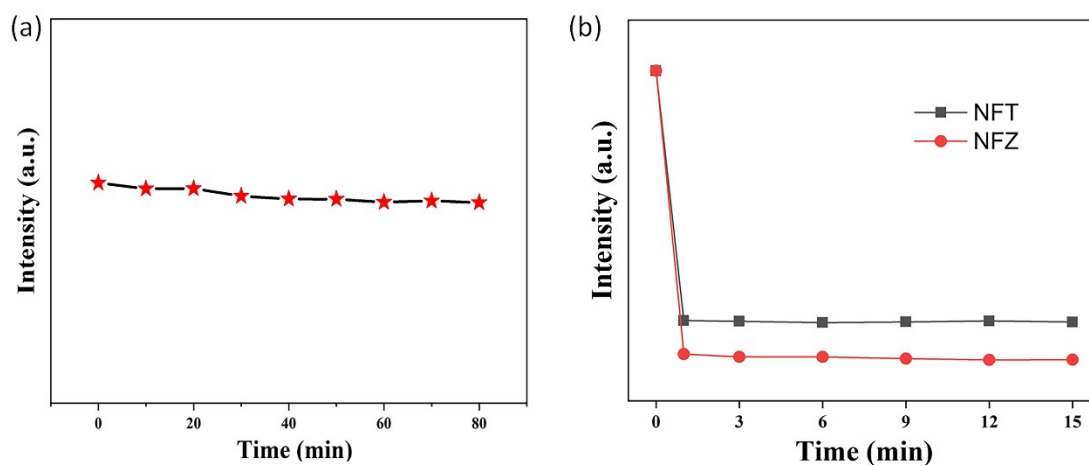

**Figure S22.** (a) Luminescent stability of suspension of **RhB@1** in EtOH within 80 minutes; (b) Response times of **RhB@1** towards NFT and NZF.

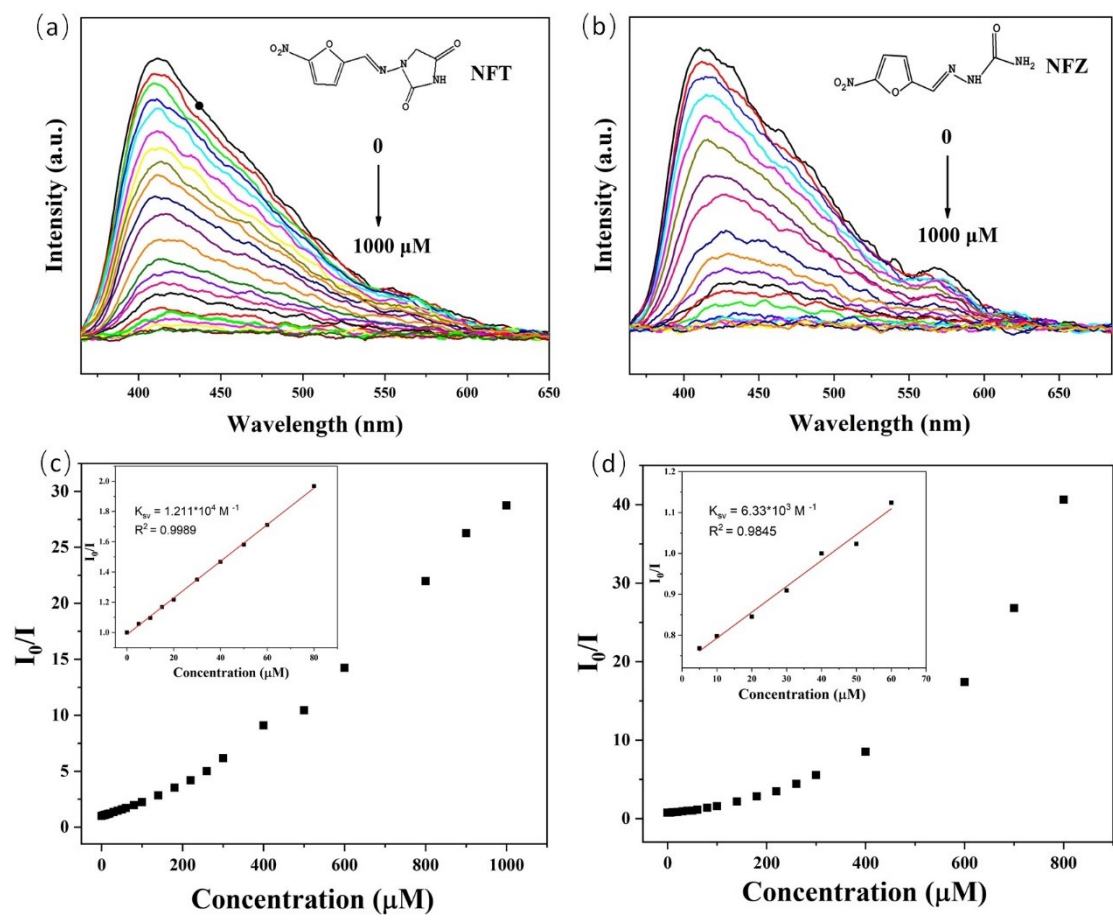

**Figure S23.** Emission spectra of **1** upon incremental addition of NFT (a) and NFZ (b); The Stern–Volume plots of **1** for NFT (c) and NFZ (d). Inset: Linear relationship of the SV plots at low concentration.

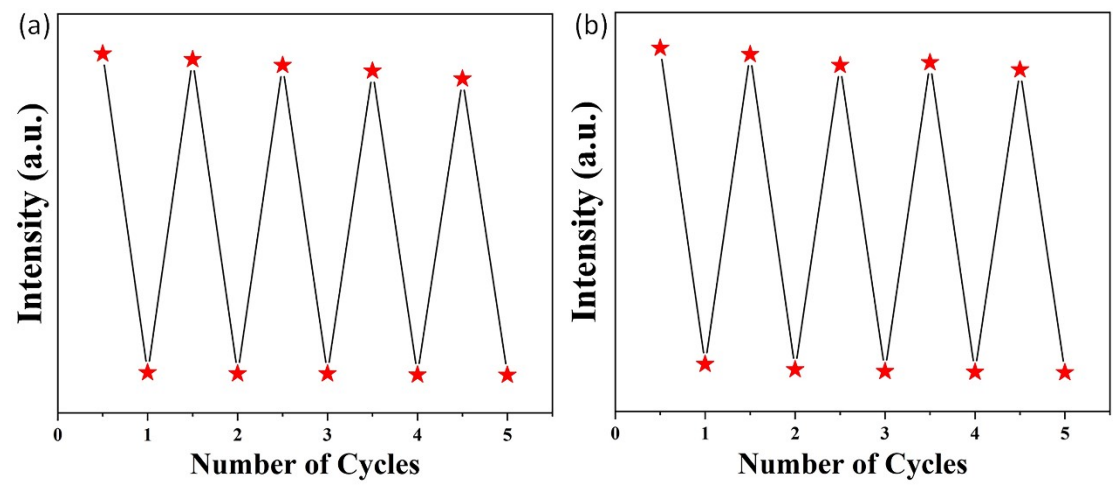

**Figure S24.** Fluorescence intensities of **1** in five recyclable experiments for sensing NFT (a) and NFZ (c) in EtOH.

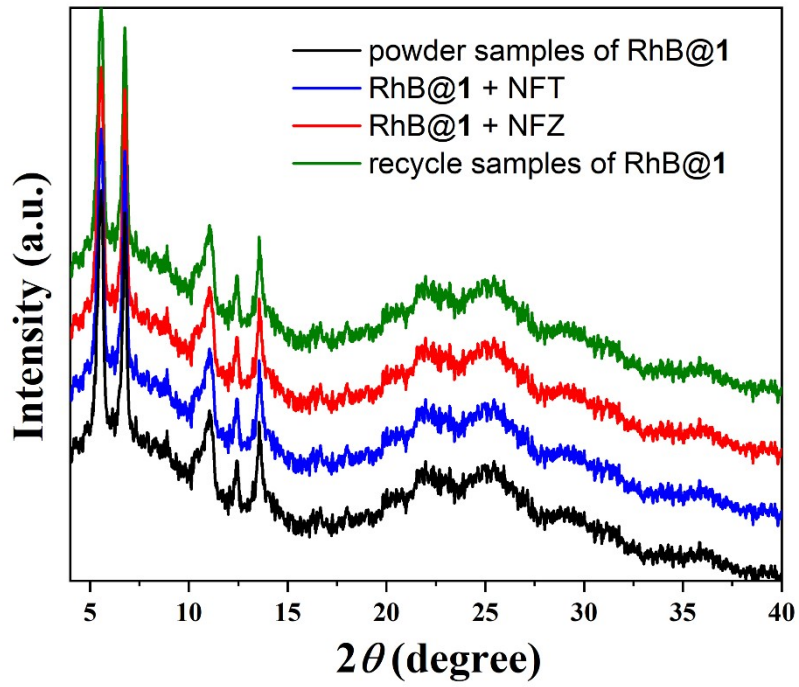

**Figure S25.** X-ray diffraction of RhB@1 before and after sensing NFT/NZF.

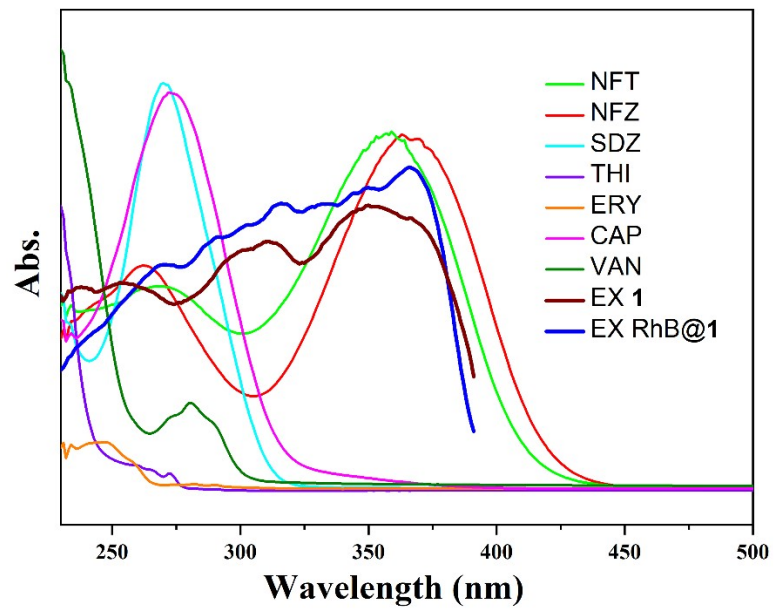

**Figure S26.** Spectral overlap between the absorption spectra of various antibiotics and the excitation spectrum of RhB@1.

**Table S4.** The values of  $K_{SV}$  and LOD of **RhB@ 1**, **CP 1** and other reported MOF sensors towards NFT/NFZ.

| MOFs                                                                                                         | NFs | $K_{SV} (\times 10^4 \text{ M}^{-1})$ | LOD ( $\mu\text{M}$ ) | solvent              | Ref.      |
|--------------------------------------------------------------------------------------------------------------|-----|---------------------------------------|-----------------------|----------------------|-----------|
| <b>RhB@1</b>                                                                                                 | NFT | 2.96                                  | 0.89                  | EtOH                 | This work |
| <b>RhB@1</b>                                                                                                 | NFZ | 2.08                                  | 0.98                  | EtOH                 | This work |
| <b>CP 1</b>                                                                                                  | NFT | 1.21                                  | 2.18                  | EtOH                 | This work |
| <b>CP 1</b>                                                                                                  | NFZ | 0.63                                  | 3.24                  | EtOH                 | This work |
| RhB@Zn-1                                                                                                     | NFT | 5.61                                  | 0.73                  | EtOH                 | 1         |
| RhB@Zn-1                                                                                                     | NFZ | 4.73                                  | 0.86                  | EtOH                 | 1         |
| $[\text{Zn}_2(\text{Py}_2\text{Tz})_2(\text{BDC})_2] \cdot 2\text{DMF} \cdot 0.5\text{H}_2\text{O}$          | NFZ | 1.726                                 | 0.91                  | $\text{H}_2\text{O}$ | 2         |
| $[\text{Eu}_2(\text{BCA})_3(\text{H}_2\text{O})(\text{DMF})_3] \cdot 0.5\text{DMF} \cdot \text{H}_2\text{O}$ | NFT | 1.6                                   | 0.16                  | $\text{H}_2\text{O}$ | 3         |
| $[\text{Eu}_2(\text{BCA})_3(\text{H}_2\text{O})(\text{DMF})_3] \cdot 0.5\text{DMF} \cdot \text{H}_2\text{O}$ | NFZ | 2.2                                   | 0.21                  | $\text{H}_2\text{O}$ | 3         |
| $\text{Zr}_6\text{O}_4(\text{OH})_8(\text{H}_2\text{O})_4(\text{CTTA})_{8/3}$                                | NFT | 3.8                                   | ---                   | $\text{H}_2\text{O}$ | 4         |
| $\{[\text{Tb}(\text{TATMA})(\text{H}_2\text{O}) \cdot 2\text{H}_2\text{O}]_n\}$                              | NFT | 3.35                                  | ---                   | $\text{H}_2\text{O}$ | 5         |
| $\{[\text{Tb}(\text{TATMA})(\text{H}_2\text{O}) \cdot 2\text{H}_2\text{O}]_n\}$                              | NFZ | 3.00                                  | ---                   | $\text{H}_2\text{O}$ | 5         |
| $[\text{Cd}_7(\text{SO}_4)_6(\text{tppe})_2] 2\text{DMF} \cdot 2\text{H}_2\text{O}$                          | NFZ | 0.174                                 | ---                   | $\text{H}_2\text{O}$ | 6         |
| $\{[\text{NH}_2(\text{CH}_3)_2]_4[\text{Zn}_3(\text{HBDPO})_2(\text{SO}_4)_2]\}_n$                           | NFT | 4.5                                   | ---                   | DMF                  | 7         |

#### References:

1. Q.-Q. Tu, L.-L. Ren, A.-L. Cheng and E.-Q. Gao, *CrystEngComm*, 2021, **23**, 629-637.
2. Z.-W. Zhai, S.-H. Yang, M. Cao, L.-K. Li, C.-X. Du and S.-Q. Zang, *Cryst. Growth Des.*, 2018, **18**, 7173-7182.
3. F. Zhang, H. Yao, T. S. Chu, G. W. Zhang, Y. Wang and Y. Y. Yang, *Chem.-Eur. J.*, 2017, **23**, 10293-10300.
4. B. Wang, X.-L. Lv, D. Feng, L.-H. Xie, J. Zhang, M. Li, Y. Xie, J.-R. Li and H.-C. Zhou, *J. Am. Chem. Soc.*, 2016, **138**, 6204-6216.

5. Q.-Q. Zhu, H. He, Y. Yan, J. Yuan, D.-Q. Lu, D.-Y. Zhang, F. Sun and G. Zhu, *Inorg. Chem.*, 2019, **58**, 7746-7753.
6. Y. Zhao, Y.-J. Wang, N. Wang, P. Zheng, H.-R. Fu, M.-L. Han, L.-F. Ma and L.-Y. Wang, *Inorg. Chem.*, 2019, **58**, 12700-12706.
7. H. He, Q.-Q. Zhu, F. Sun and G. Zhu, *Cryst. Growth Des.*, 2018, **18**, 5573-5581.
